# Supplementary material
Source: HighWire-hosted journal article supplement (https://bmjopen.bmj.com/content/12/10/e058340)
Supplement: inline-supplementary-material-1 [file inline-supplementary-material-1.pdf]

## Appendix 1

*Infant (0-68 month) developmental outcomes, according to familial patterns of HIV infection – sample limited to adolescent mothers only*

|                                                           | Overall<br>(N=1015) | Third<br>Generation<br>(n= 23) | Second<br>Generation<br>(n= 229) | No HIV<br>Exposure<br>(n= 721) | p-<br>value |
|-----------------------------------------------------------|---------------------|--------------------------------|----------------------------------|--------------------------------|-------------|
| <b>Mullen Scales of<br/>Child Development</b><br>(M, SD)  |                     |                                |                                  |                                |             |
| Gross Motor Score*                                        | 49.7 (12.5)         | 54.3 (16. 7) <sup>a</sup>      | 46.8 (12.7) <sup>b</sup>         | 50.3 (12.2)                    | <.001       |
| Visual Reception Score                                    | 42.1 (14.2)         | 44.0 (13.7)                    | 40.4 (14.1)                      | 42.5 (14.2)                    | .12         |
| Fine Motor Score                                          | 43.7(14.7)          | 45.0 (16.2)                    | 41.3 (15.5) <sup>b</sup>         | 44.4 (14.3)                    | .017        |
| Receptive Language<br>Score                               | 47.5 (13.5)         | 48.5 (14.0)                    | 46.4 (14.9)                      | 47.8 (13.0)                    | .37         |
| Expressive Language<br>Score                              | 51.6 (13.5)         | 51.1 (14.0)                    | 51.0 (14.8)                      | 51.8 (13.0)                    | .71         |
| Composite Score                                           | 93.3 (21.3)         | 95.0 (23.1)                    | 90.6 (22.8)                      | 94.1 (20.7)                    | .098        |
| <b>WHO Disability<br/>Score- Any Disability</b><br>(N, %) | 234 (26.9%)         | 6 (27.3%)                      | 63 (28.9%)                       | 165 (26.2%)                    | .73         |
| <b>Any Days Sick</b> (past<br>month) (N, %)               | 212 (22.1%)         | 3 (15.0%)                      | 37 (16.2%)                       | 172 (24.2%)                    | .032        |

*Notes.* Group comparisons were conducted using  $\chi^2$  tests for categorical variables and univariate analyses of variance for continuous variables. \*Gross motor score:  $n = 831$ . Mullen subdomain scores range from 20-80, composite scores from 49-155. Tukey's range post hoc tests were undertaken to identify mean differences between groups for continuous variable: <sup>a</sup> Statistically different from the second generation ( $p < 0.05$ ), <sup>b</sup> Statistically different from HIV unexposed group ( $p < 0.05$ ).
